# Supplementary material for: Pore Water Chemical Variability and Its Effect on Phenological Production in Three Mangrove Species under Drought Conditions in Southeastern Mexico
Source: MDPI journal article supplement (doi:10.3390/d14080668), 2022-08-17
Supplement: s1 [file s1]

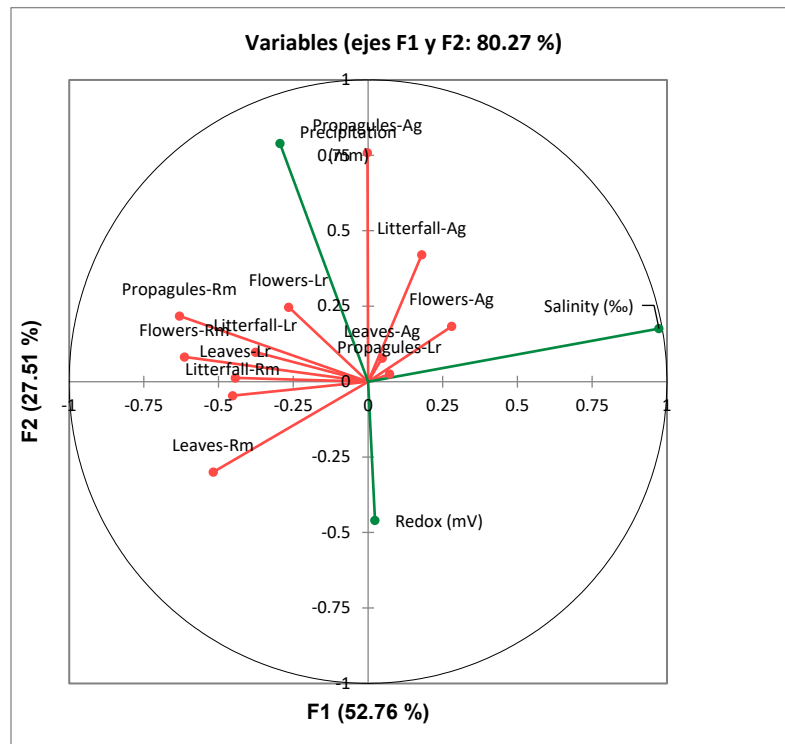

**Figure S1.** Bi-plot correlation between three mangrove species phenological production and physicochemical parameters (canonical variables) in 2009.

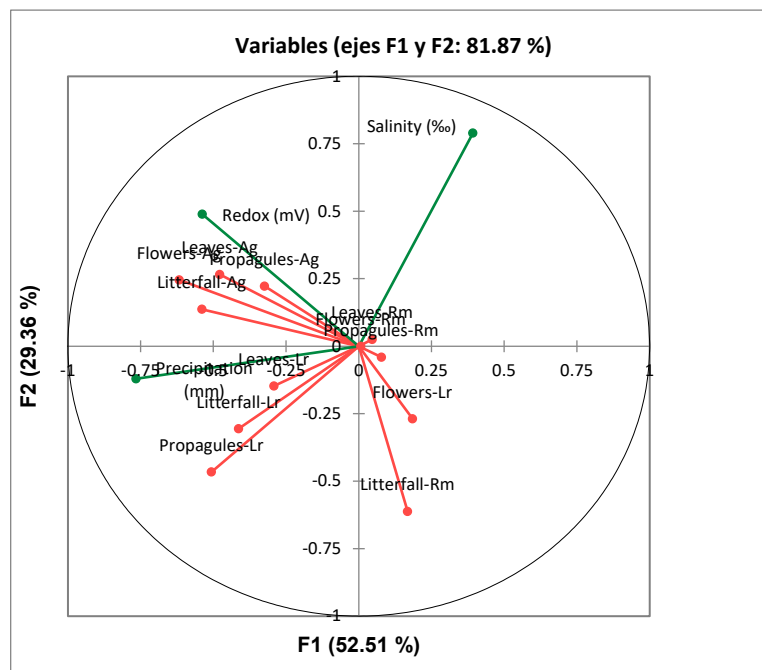

**Figure S2.** Bi-plot correlation between three mangrove species phenological production and physicochemical parameters (canonical variables) in 2010.

**Table S1.** Structural metrics computed for the structural analysis (adapted from Cintron et al. [33] and Akodekou [34]).

| Parameters                  | Formula                                             | Explanation                                                                      |
|-----------------------------|-----------------------------------------------------|----------------------------------------------------------------------------------|
| <b>Dominance pattern</b>    |                                                     |                                                                                  |
| Density (trees/ha)          | $\frac{n \times 10000}{s}$                          | n = number of individuals in the plot area s                                     |
| Relative dominance (RDo)    | $\frac{TA}{BA} \times 100$                          | TA = Total basal area of a species,<br>BA = Basal area of all species (G)        |
| <b>Stand structure</b>      |                                                     |                                                                                  |
| The overall basal area, $G$ | $G = \frac{10000\pi}{4s} \sum_{i=1}^{n_g} d_i^2$    | $d_i$ represents respectively the diameter of a tree $i$ of the plot             |
| The average diameter, $D$   | $D = \sqrt{\frac{1}{n} \sum_{i=1}^n d_i^2}$         | $d_i$ represents respectively the diameter of a tree $i$ of the plot             |
| The average height, $H$     | $H = \frac{\sum_{i=1}^n g_i h_i}{\sum_{i=1}^n g_i}$ | $g_i$ and $h_i$ are respectively the basal area and the height of the tree $i$ . |

**Table S2.** Summary of Fisher's Least Significant Difference post hoc tests conducted for the nested ANOVA on litter fall production and components in comparison with sites and seasons. *Ag*: *Avicennia germinans*; *Lr*: *Laguncularia racemosa*; *Rm*: *Rhizophora mangle*. Peten Neyac, Río Verde, Champotón, Sabancuy, Xibuja, Estero Pargo y Atasta, with a significance level of  $p < 0.05$ .

|                            | LSD (Least Significant Difference) |         |            |             |
|----------------------------|------------------------------------|---------|------------|-------------|
|                            | Leaves                             | Flowers | Propagules | Litter fall |
| Sites                      |                                    |         |            |             |
| Atasta - Champotón         | 0.53*                              | 0.01    | 2.44*      | 0.42*       |
| Atasta - Estero Pargo      | 0.33*                              | 0.04    | 2.91*      | 0.28*       |
| Atasta - Peten Neyac       | 0.84*                              | 0.14*   | 3.33*      | 0.74*       |
| Atasta - Río Verde         | 0.42*                              | -0.04   | 1.49*      | 0.26        |
| Atasta - Sabancuy          | 0.43*                              | 0.02    | 3.68*      | 0.53*       |
| Atasta - Xibuja            | 0.45*                              | 0.03    | 3.46*      | 0.36*       |
| Champotón - Estero Pargo   | -0.20                              | 0.03    | 0.47       | -0.13       |
| Champotón - Peten Neyac    | 0.31*                              | 0.12*   | 0.89       | 0.32*       |
| Champotón - Río Verde      | -0.11                              | -0.05   | -0.95      | -0.16       |
| Champotón - Sabancuy       | -0.01                              | 0.01    | 1.24       | 0.11        |
| Champotón - Xibuja         | -0.07                              | 0.02    | 1.02       | -0.06       |
| Estero Pargo - Peten Neyac | 0.50*                              | 0.09*   | 0.42       | 0.46*       |
| Estero Pargo - Río Verde   | 0.09                               | -0.08*  | -1.41      | -0.03       |
| Estero Pargo - Sabancuy    | 0.10                               | -0.02   | 0.77       | 0.24        |

|                         |        |        |        |        |
|-------------------------|--------|--------|--------|--------|
| Estero Pargo - Xibuja   | 0.12   | -0.01  | 0.55   | 0.07   |
| Peten Neyac - Río Verde | -0.42* | -0.17* | -1.84* | -0.48* |
| Peten Neyac - Sabancuy  | -0.40* | -0.12* | 0.35   | -0.21  |
| Peten Neyac - Xibuja    | -0.38* | -0.11* | 0.13   | -0.38* |
| Río Verde - Sabancuy    | 0.01   | 0.05   | 2.19*  | 0.27*  |
| Río Verde - Xibuja      | 0.04   | 0.07*  | 1.96*  | 0.10   |
| Sabancuy - Xibuja       | 0.02   | 0.01   | -0.22  | -0.17  |
| Seasons                 |        |        |        |        |
| Dry - Rainy             | -0.23* | -0.10* | -3.65* | -0.31* |
| Dry - Nortes            | 0.31*  | 0.02   | -2.96* | 0.61*  |
| Rainy- Nortes           | 0.54*  | 0.11*  | 0.69   | 0.93*  |
| Species                 |        |        |        |        |
| Ag – Lr                 | 0.34*  | 0.17*  | 0.36   | 0.34*  |
| Ag – Rm                 | -0.79* | -0.19* | -3.41* | -0.77* |
| Lr - Rm                 | -1.12* | -0.36* | -3.77* | -1.11* |

*p*-value: \* *p*<0.05.

**Table S3.** Comparison of Fisher's Least Significant Difference post hoc tests conducted for the nested ANOVA on potential redox, salinity and precipitation in comparison with sites and seasons, with a significance level of  $p < 0.05$ .

| LSD (Least Significant Difference) |                 |          |               |
|------------------------------------|-----------------|----------|---------------|
| Sites                              | Redox potential | Salinity | Precipitation |
| Atasta - Champoton                 | 104.15*         | -0.58    | 1.168*        |
| Atasta - Estero Pargo              | 110.88*         | -23.56*  | 0.23          |
| Atasta - Peten Neyac               | 117.63*         | -20.75*  | 1.01*         |
| Atasta - Rio Verde                 | 126.89*         | -27.94*  | 0.96*         |
| Atasta - Sabancuy                  | 62.51*          | -34.99*  | 0.41          |
| Atasta - Xibuja                    | 50.14           | -22.88*  | 0.38          |
| Champoton - Estero Pargo           | 6.72            | -22.97*  | -0.94*        |
| Champoton - Peten Neyac            | 13.47           | -20.17*  | -0.15         |
| Champoton - Rio Verde              | 22.74           | -27.36*  | -0.20         |
| Champoton - Sabancuy               | -41.65          | -34.40*  | -0.76*        |
| Champoton - Xibuja                 | -54.01          | -22.29*  | -0.79*        |
| Estero Pargo - Peten Neyac         | 6.75            | 2.81     | 0.79*         |
| Estero Pargo - Rio Verde           | 16.02           | -4.39    | 0.74*         |
| Estero Pargo - Sabancuy            | -48.37          | -11.43*  | 0.19          |
| Estero Pargo - Xibuja              | -60.73*         | 0.68     | 0.15          |
| Peten Neyac - Rio Verde            | 9.26            | -7.19*   | -0.05         |
| Peten Neyac - Sabancuy             | -55.12          | -14.23*  | -0.60         |
| Peten Neyac - Xibuja               | -67.49*         | -2.13    | -0.63         |
| Rio Verde - Sabancuy               | -64.39*         | -7.04*   | -0.55         |
| Rio Verde - Xibuja                 | -76.75*         | 5.07     | -0.58         |
| Sabancuy - Xibuja                  | -12.36          | 12.11*   | -0.03         |
| <b>Seasons</b>                     |                 |          |               |
| Dry - Rainy                        | 10.52*          | 4.86*    | -2.58*        |
| Dry - Nortes                       | 54.92*          | 2.196    | -1.45*        |
| Rainy - Nortes                     | 44.40*          | -2.66    | 1.124*        |

*p*-value: \*  $p < 0.05$ .

a)

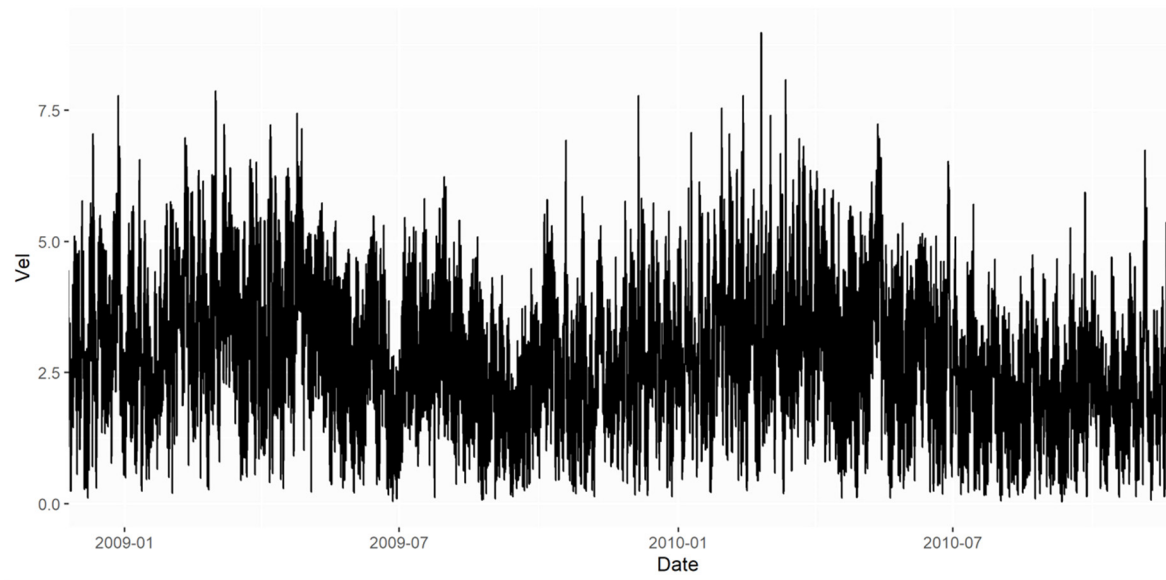

b)

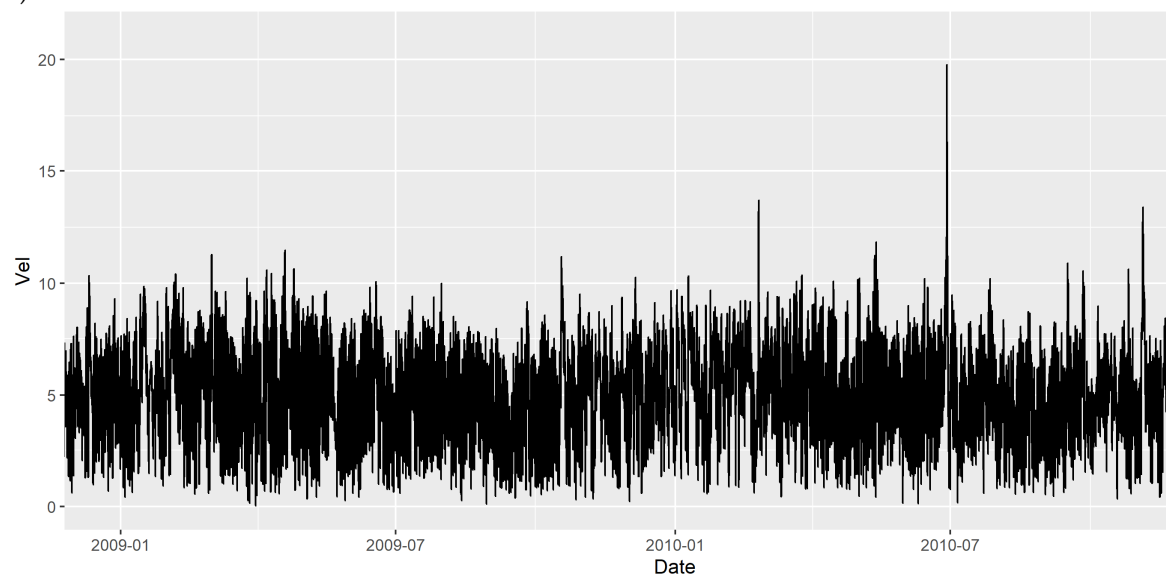

c)

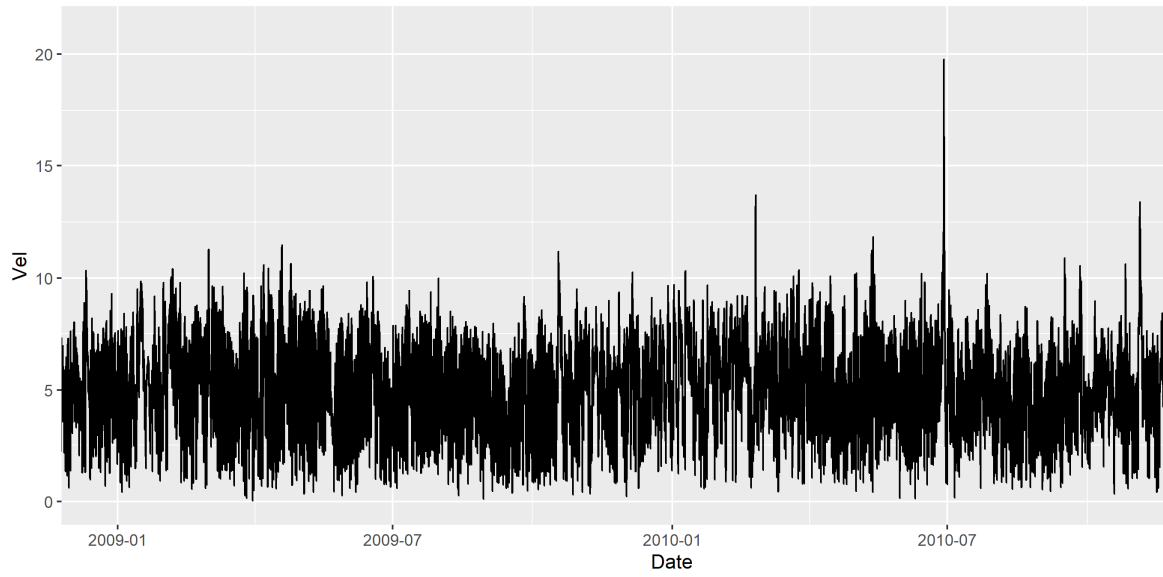

**Figure S3.** Wind 10 m above ground, 2009-2010, ERA 5 Database along Campeche coast. a) Carmen City, b) Champoton, and c) Los Petenes Biosphere Reserve.
